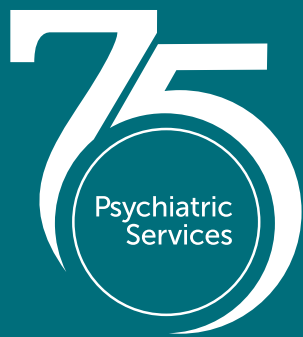

# Psychiatric Services

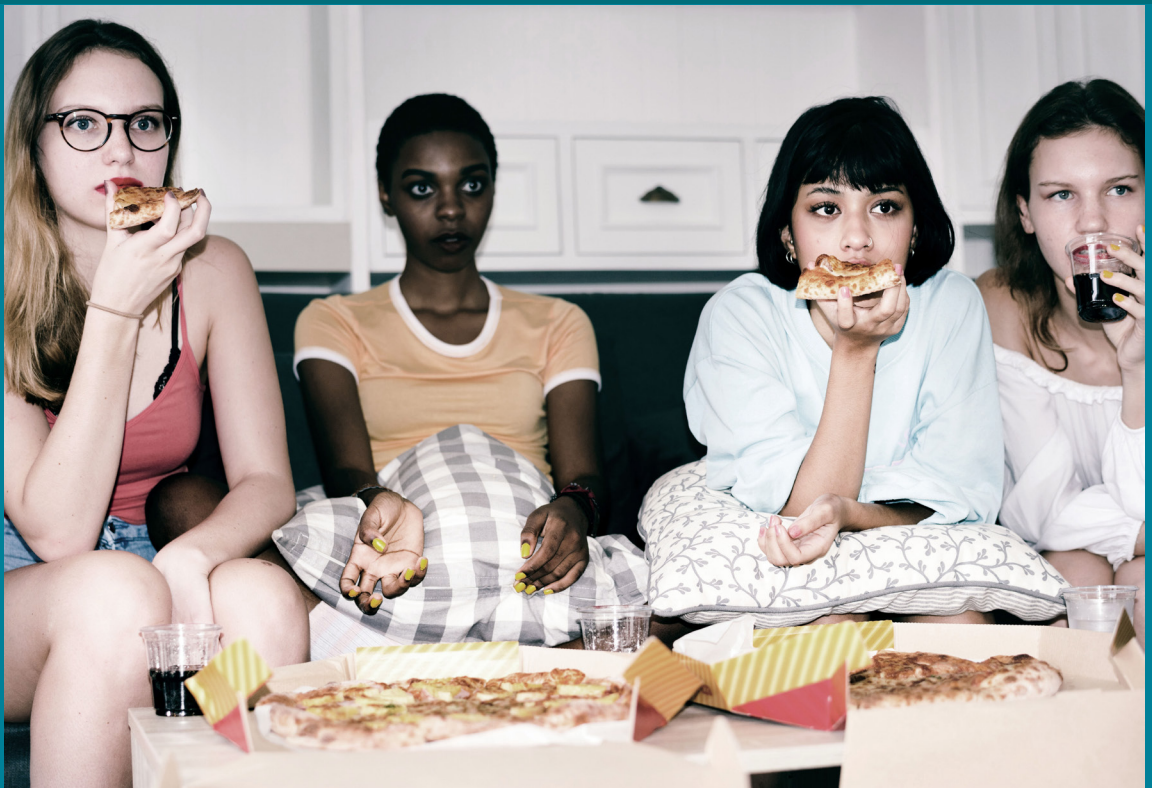

Inequities in treatment access for eating disorders

Opioid use disorders among people with mental illness

The behavioral health support specialist career

Addressing mental health needs on college campuses
