# Psychiatric Services

A Journal of the American Psychiatric Association

*Psychiatric Services*, established in 1950, is published monthly by the American Psychiatric Association for mental health professionals and others concerned with treatment and services for persons with mental illnesses and mental disabilities, in keeping with APA's objectives to improve care and treatment, to promote research and professional education in psychiatric and related fields, and to advance the standards of all psychiatric services and facilities.

## Mailing Address

*Psychiatric Services*  
American Psychiatric Association  
800 Maine Ave., S.W., Suite 900  
Washington, DC 20024  
E-mail: psjournal@psych.org

## Editorial Staff

Demarie S. Jackson  
*Managing Editor*  
Martin J. Spiering, Ph.D., E.L.S.  
*Senior Editor*  
Corey Parker  
*Senior Editor*  
Wendy Lieberman Taylor  
*Production Manager*  
Heidi A. Koch-Bubel  
*Editorial Support Services Manager*

## Publisher

Simone Taylor, Ph.D.

## Editorial Director, Journals

Michael D. Roy

## American Psychiatric Association

Ramaswamy Viswanathan, M.D.,  
Dr.Med.Sc.

### President

Theresa Miskimen, M.D.

### President-Elect

Marketa Wills, M.D., M.B.A.

*Chief Executive Officer and Medical  
Director*

## Editor

Lisa B. Dixon, M.D., M.P.H.

## Editorial Board

Deidre M. Anglin, Ph.D.  
Chyrell Bellamy, Ph.D., M.S.W.  
Daniel M. Blonigen, Ph.D.  
Samuel J. Dotson, M.D.  
Robert J. Hilt, M.D.  
Shalini Lal, Ph.D.  
Michael A. Lindsey, Ph.D., M.S.W.  
Christina Mangurian, M.D., M.A.S.  
Octavio N. Martinez, Jr., M.D., M.P.H.  
Hunter L. McQuiston, M.D.  
Jeanne Miranda, Ph.D.  
Mark Olfson, M.D., M.P.H.  
David W. Oslin, M.D.  
Delbert Robinson, M.D.  
Rebecca C. Rossom, M.D., M.S.  
Jason Schiffman, Ph.D.  
Ruth S. Shim, M.D., M.P.H.  
Helene Speyer, M.D., Ph.D.  
Philip Wang, M.D., Dr.P.H.

## Contributing Editors

### *Controversies in Psychiatric Services*

Matthew D. Erlich, M.D., Patrick  
Runnels, M.D., M.B.A., and Rachel  
M.Talley, M.D.

### *Culture & Mental Health Services*

Roberto Lewis-Fernández, M.D., and  
Deidre M. Anglin, Ph.D.

### *Datapoints*

Tami L. Mark, Ph.D., and Alexander J.  
Cowell, Ph.D.

### *Economic Grand Rounds*

Steven S. Sharfstein, M.D., Haiden A.  
Huskamp, Ph.D., and Alison Evans  
Cuellar, Ph.D.

### *Editor's Choice*

Carrie Cunningham, M.D., M.P.H.,  
Nicole Kozloff, M.D., M.S., and Andrew  
D. Carlo, M.D., M.P.H.

### *From Pages to Practice* podcast

Josh Berezin, M.D., M.S.

### *Frontline Reports*

Stephen M. Goldfinger, M.D., and  
Yaara Zisman-Ilani, M.A., Ph.D.

### *Global Mental Health Reforms*

Pamela Y. Collins, M.D., M.P.H., Matías  
Irrarázaval, M.D., M.P.H., Helen E. Jack,  
M.D., and Lola Kola, Ph.D.

### *Integrated Care*

Benjamin G. Druss, M.D., M.P.H., Gail L.  
Daumit, M.D., M.H.S., and Carrie  
Cunningham, M.D., M.P.H.

### *Law & Psychiatry*

Paul S. Appelbaum, M.D.

### *Lived Experience Inclusion & Power in Services & Research*

Morgan C. Shields, Ph.D., Jonathan P.  
Edwards, Ph.D., L.C.S.W., and Keris Jän  
Myrick, M.B.A., M.S.

### *Personal Accounts*

Patricia E. Deegan, Ph.D., and William  
C. Torrey, M.D.

### *Promoting High-Value Mental Health Care*

Marcela Horvitz-Lennon, M.D., M.P.H.,  
and Kenneth Minkoff, M.D.

### *Racism & Mental Health Equity*

Ruth Shim, M.D., M.P.H., Michael  
Mensah, M.D., M.P.H., and Lucy  
Ogbu-Nwobodo, M.D., M.S.

### *Research, Community, & Services*

#### *Partnerships*

Debra A. Pinals, M.D., Enrico G.  
Castillo, M.D., M.S.H.P.M., and Ayorkor  
Gaba, Psy.D.

### *Social Determinants of Mental Health*

Ruth S. Shim, M.D., M.P.H., Michael T.  
Compton, M.D., M.P.H., and Eric  
Rafla-Yuan, M.D.

### *State Mental Health Policy*

Marvin S. Swartz, M.D., and Michael  
Flores, Ph.D., M.P.H.

### *Technology in Mental Health*

Dror Ben-Zeev, Ph.D.

## Editor Emeritus

Howard H. Goldman, M.D., Ph.D.

## Statistical Consultant

Melanie M. Wall, Ph.D.

## Qualitative Reviews Consultant

Jocelyn Marrow, Ph.D.

## Systematic Reviews Consultant

Yaara Zisman-Ilani, M.A., Ph.D.

## Editorial Consultants

Michelle S. Franklin, Ph.D., M.S.N.  
Shirley M. Glynn, Ph.D.  
Morgan C. Shields, Ph.D.
